# Supplementary material for: CO2-Switchable Hierarchically Porous Zirconium-Based MOF-Stabilized Pickering Emulsions for Recyclable Efficient Interfacial Catalysis
Source: MDPI journal article supplement (doi:10.3390/ma16041675), 2023-02-17
Supplement: s1 [file s1]

## **Supporting Information**

### **CO<sub>2</sub>-Switchable Hierarchically Porous Zirconium-Based MOF-Stabilized Pickering Emulsions for Recyclable Efficient Interfacial Catalysis**

Xiaoyan Pei\*, Jiang Liu, Wangyue Song, Dongli Xu, Zhe Wang and Yanping Xie

*College of Chemistry and Chemical Engineering, Xinyang Normal University, Xinyang 464000, China.*

\* Correspondence: xiaoyanpei2009@163.com

Number of pages: 16

Number of figures: 28

Number of tables: 3

#### **Table of Contents**

|                              |     |
|------------------------------|-----|
| 1. Experimental section..... | S3  |
| 2. Figures S1-S28.....       | S4  |
| 3. Tables S1-S3.....         | S16 |

## 1. Experimental section

## Materials

ZrCl<sub>4</sub>, Zn(NO)<sub>3</sub>·6H<sub>2</sub>O, benzoic acid, 2,5-dihydroxyterephthalic acid, and 2,5-dihydroxyterephthalic acid were obtained from Aladdin. (3-Aminopropyl)trimethoxysilane (APTMS), 3-(2-aminoethylamino)propyltrimethoxysilane (AEAPTMS) and 3-[2-(2-aminoethylamino)ethylamino]propyl-trimethoxysilane (AEAEAPTMS) were obtained from Energy Chemical Co., Ltd. CO<sub>2</sub> (Praxair, SFC grade, 99.998 vol%) and N<sub>2</sub> (Praxair, 99.9993 vol%) were obtained from Praxair. All the chemicals were used as received unless otherwise stated.

## Instrumentation

X-ray photoelectron spectroscopy (XPS) were determined on a Thermo Scientific K-Alpha electron energy spectrometer using Al K $\alpha$  (1486.6 eV) as the X-ray source. X-ray diffraction (XRD) patterns were measured on a Rigaku SmartLab9 diffractometer with monochromatic Cu K $\alpha$  radiation ( $\lambda = 1.5418 \text{ \AA}$ ). Scanning electron microscopy (SEM) were recorded on a Hitachi S-4800 microscope at 5 kV. Nuclear magnetic resonance (NMR) spectra were carried out on a JNM-ECZ600R/S3 spectrometer (600 MHz). Mass spectra were measured on an Agilent GC-MS-5890A/5975C Plus spectrometer (EI). Water contact angles were obtained through a KRÜSS Drop Shape Analyzer 25 (KRÜSS DSA25).

## 2. Figures S1-S28

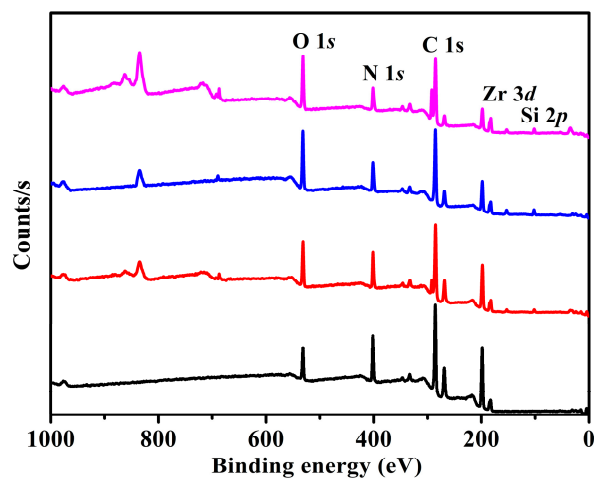

**Figure S1** XPS spectrum of (a) H-UiO-66-(OH)<sub>2</sub>, (b) H-UiO-66-(OAPTMS)<sub>2</sub>, (c) H-UiO-66-(OAEAPTMS)<sub>2</sub> and (d) H-UiO-66-(OAEAEAPTMS)<sub>2</sub>.

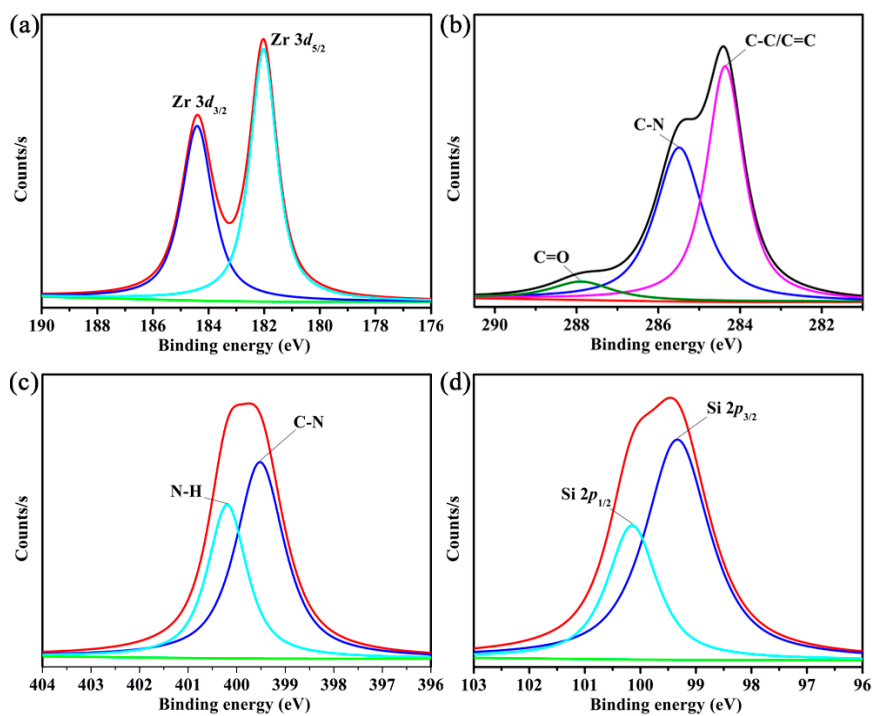

**Figure S2** High-resolution XPS spectrum of Zr 3d (a), C 1s (b), N 1s (c) and Si 2p (d) of H-UiO-66-(OAPTMS)<sub>2</sub>.

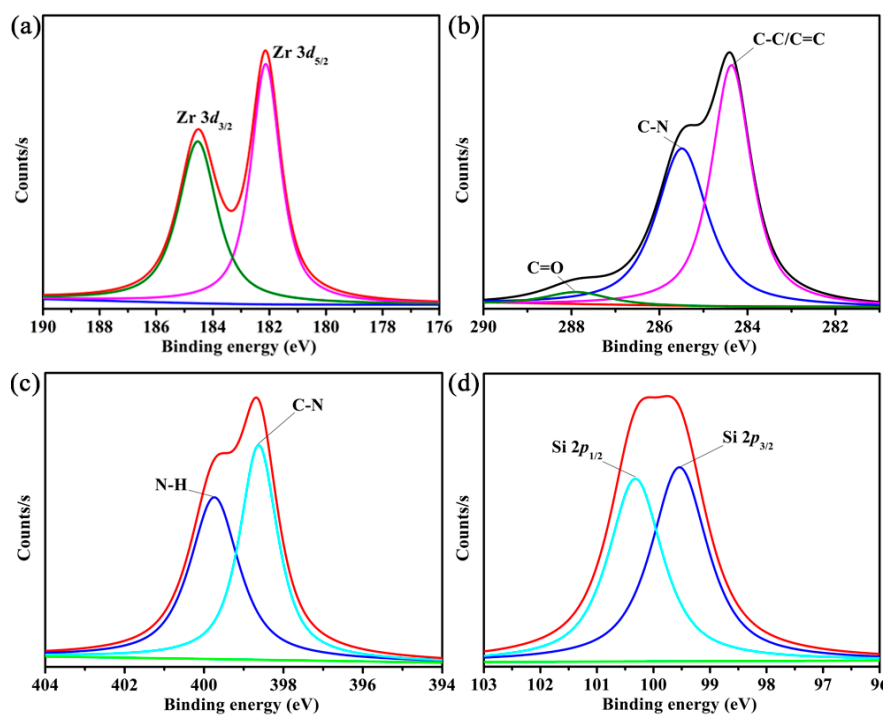

**Figure S3** High-resolution XPS spectrum of Zr 3d (a), C 1s (b), N 1s (c) and Si 2p (d) of H-UiO-66-(OAEAPTMS)<sub>2</sub>.

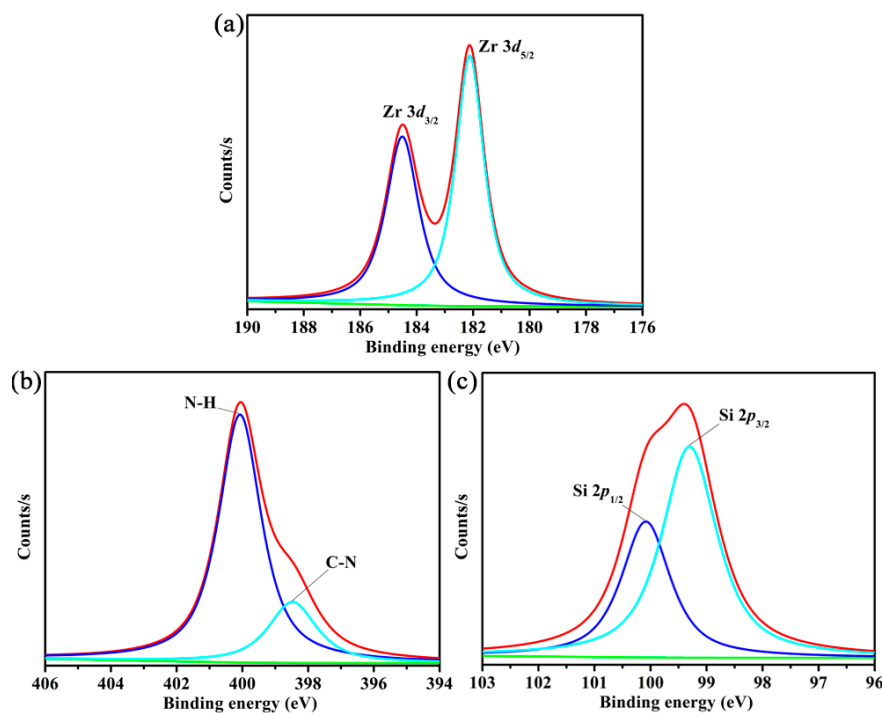

**Figure S4** High-resolution XPS spectrum of Zr 3d (a), N 1s (b) and Si 2p (c) of H-UiO-66-(OAEAPTMS)<sub>2</sub>.

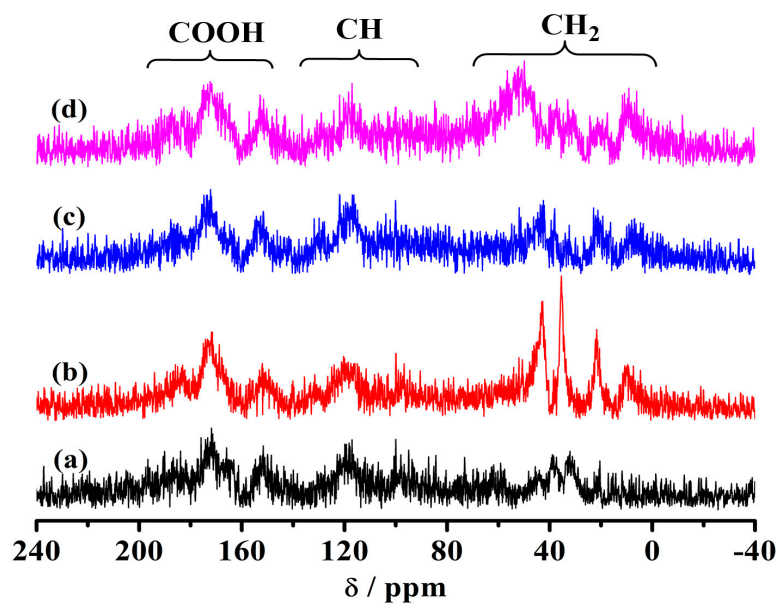

**Figure S5** Solid-state  $^{13}\text{C}$  NMR spectra of (a) H-UiO-66-(OH)<sub>2</sub>, (b) H-UiO-66-(OAPTMS)<sub>2</sub>, (c) H-UiO-66-(OAEAPTMS)<sub>2</sub> and (d) H-UiO-66-(OAEAEAPTMS)<sub>2</sub>.

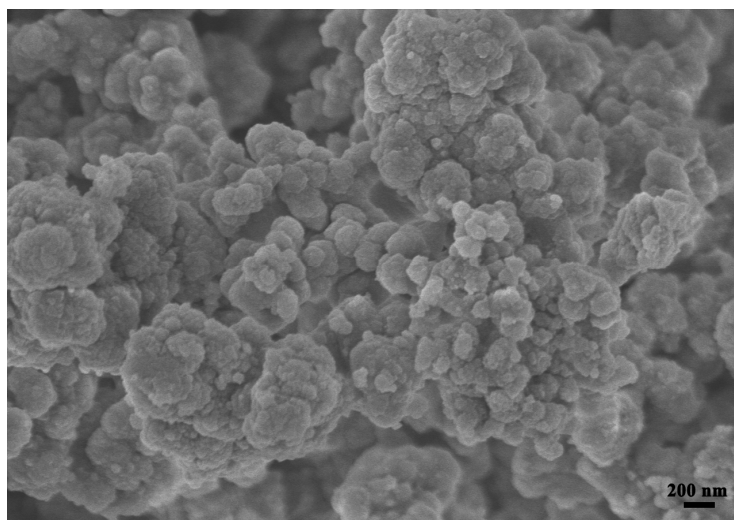

**Figure S6** SEM image of the pristine H-UiO-66-(OH)<sub>2</sub>.

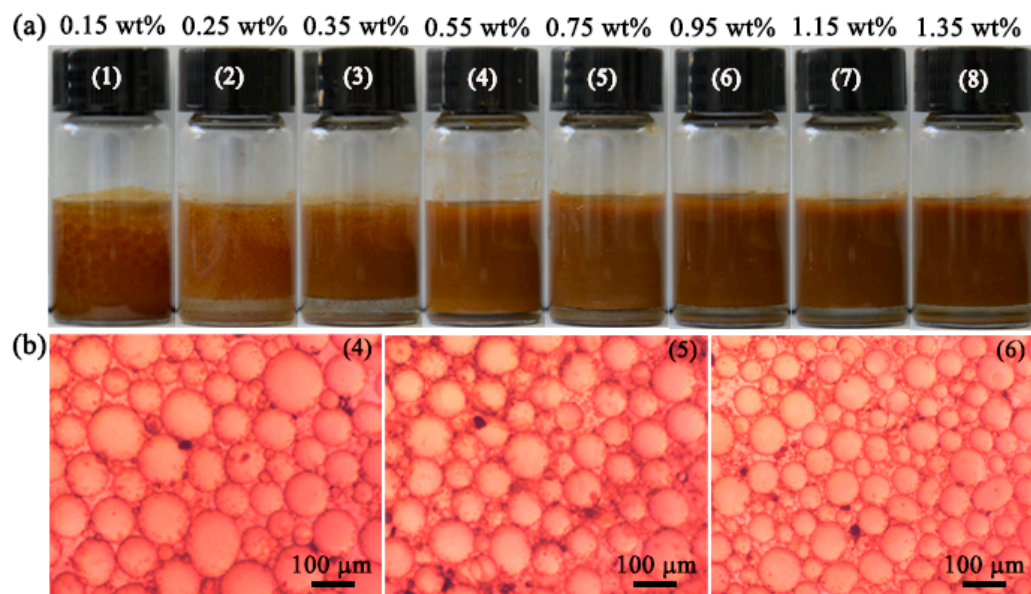

**Figure S7** Photographs of toluene-in-water emulsions stabilized by H-UiO-66-(OAPTMS)<sub>2</sub> (a) and chosen micrographs for (4), (5) and (6) in (a) (b).

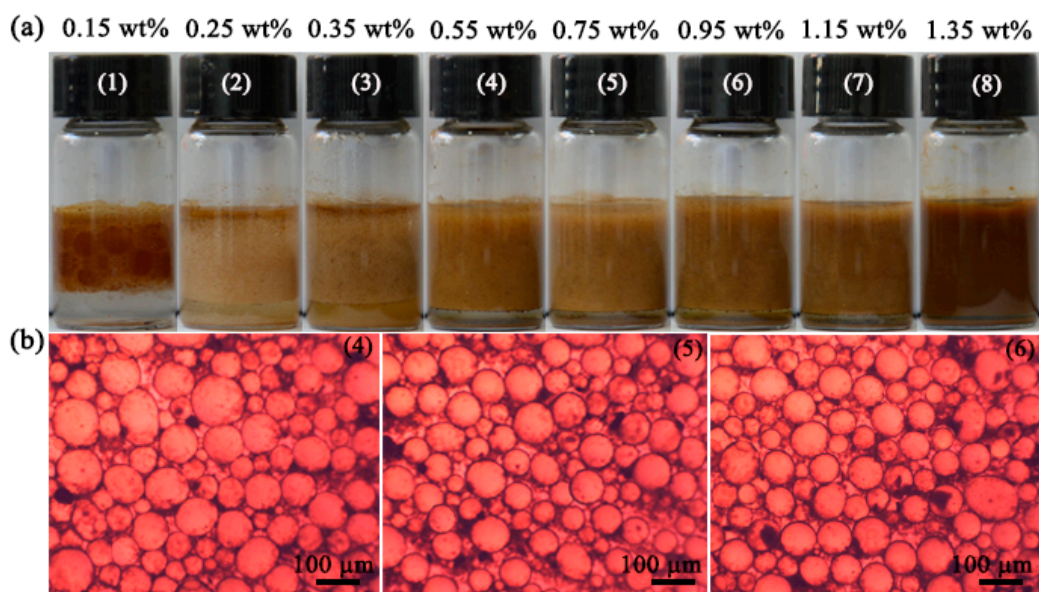

**Figure S8** Photographs of toluene-in-water emulsions stabilized by H-UiO-66-(OAEAPTMS)<sub>2</sub> (a) and chosen micrographs for (4), (5) and (6) in (a) (b).

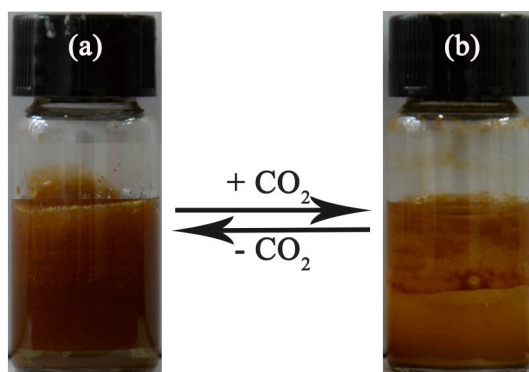

**Figure S9** Photographs of benzene (3 ml)-water (2 ml) emulsion stabilized by H-UiO-66-(OAPTMS)<sub>2</sub> (0.55 wt%): (a), before CO<sub>2</sub> bubbling; (b), after CO<sub>2</sub> bubbling.

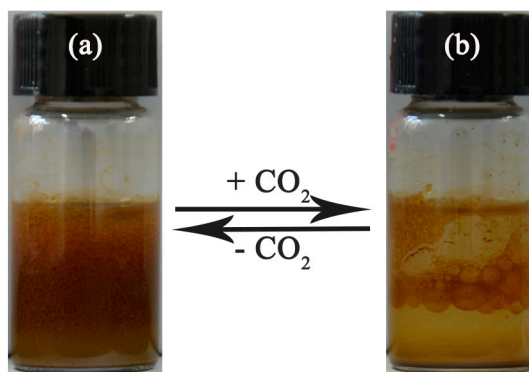

**Figure S10** Photographs of benzene (3 ml)-water (2 ml) emulsion stabilized by H-UiO-66-(OAEAPTMS)<sub>2</sub> (0.55 wt%): (a), before CO<sub>2</sub> bubbling; (b), after CO<sub>2</sub> bubbling.

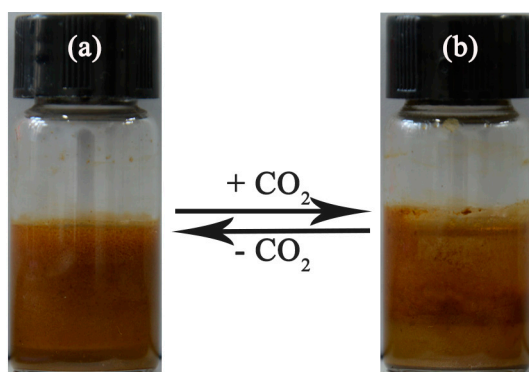

**Figure S11** Photographs of benzene (3 ml)-water (2 ml) emulsion stabilized by H-UiO-66-(OAEAEAPTMS)<sub>2</sub> (0.55 wt%): (a), before CO<sub>2</sub> bubbling; (b), after CO<sub>2</sub> bubbling.



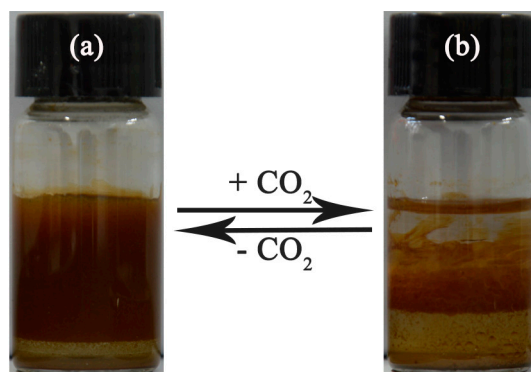

**Figure S12** Photographs of n-hexane (3 ml)-water (2 ml) emulsion stabilized by H-UiO-66-(OAPTMS)<sub>2</sub> (0.55 wt%): (a), before CO<sub>2</sub> bubbling; (b), after CO<sub>2</sub> bubbling.

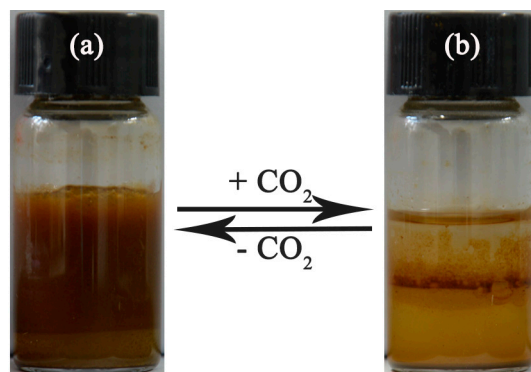

**Figure S13** Photographs of n-hexane (3 ml)-water (2 ml) emulsion stabilized by H-UiO-66-(OAEAPTMS)<sub>2</sub> (0.55 wt%): (a), before CO<sub>2</sub> bubbling; (b), after CO<sub>2</sub> bubbling.

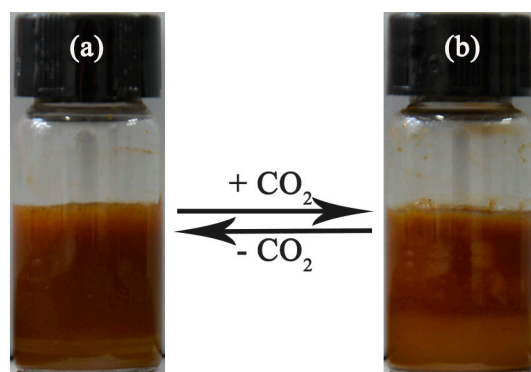

**Figure S14** Photographs of n-hexane (3 ml)-water (2 ml) emulsion stabilized by H-UiO-66-(OAEAEAPTMS)<sub>2</sub> (0.55 wt%): (a), before CO<sub>2</sub> bubbling; (b), after CO<sub>2</sub> bubbling.

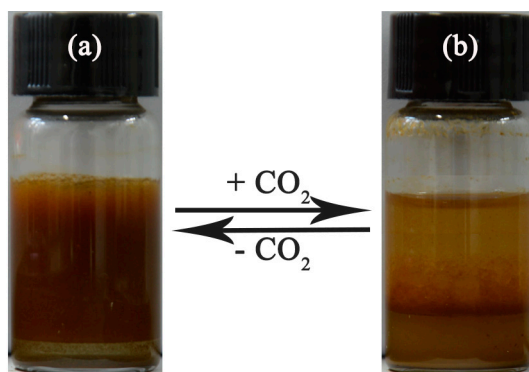

**Figure S15** Photographs of cyclohexane (3 ml)-water (2 ml) emulsion stabilized by H-UiO-66-(OAPTMS)<sub>2</sub> (0.55 wt%): (a), before CO<sub>2</sub> bubbling; (b), after CO<sub>2</sub> bubbling.

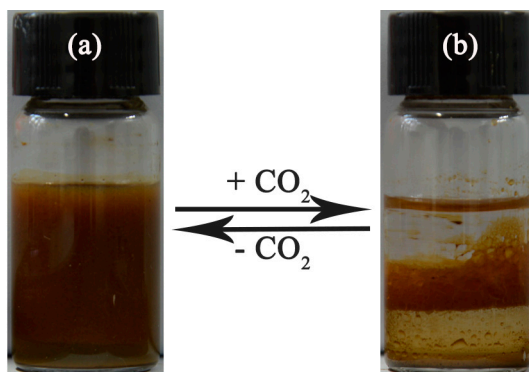

**Figure S16** Photographs of cyclohexane (3 ml)-water (2 ml) emulsion stabilized by H-UiO-66-(OAEAPTMS)<sub>2</sub> (0.55 wt%): (a), before CO<sub>2</sub> bubbling; (b), after CO<sub>2</sub> bubbling.

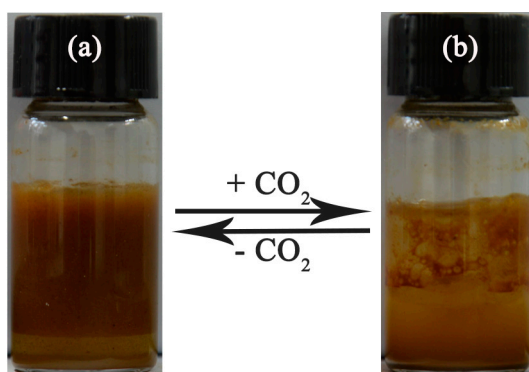

**Figure S17** Photographs of cyclohexane (3 ml)-water (2 ml) emulsion stabilized by H-UiO-66-(OAEAEAPTMS)<sub>2</sub> (0.55 wt%): (a), before CO<sub>2</sub> bubbling; (b), after CO<sub>2</sub> bubbling.

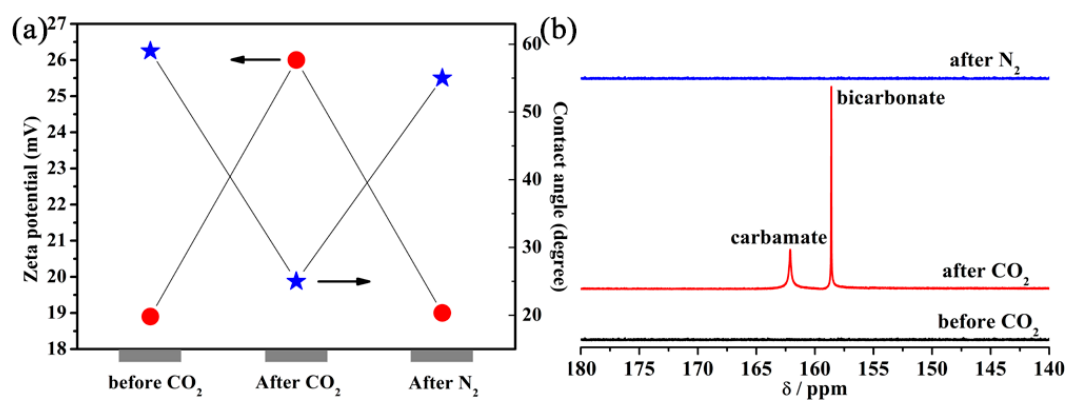

**Figure S18** Zeta potential and contact angle of H-UiO-66-(OAPTMS)<sub>2</sub> before CO<sub>2</sub>, after CO<sub>2</sub> and after N<sub>2</sub>.

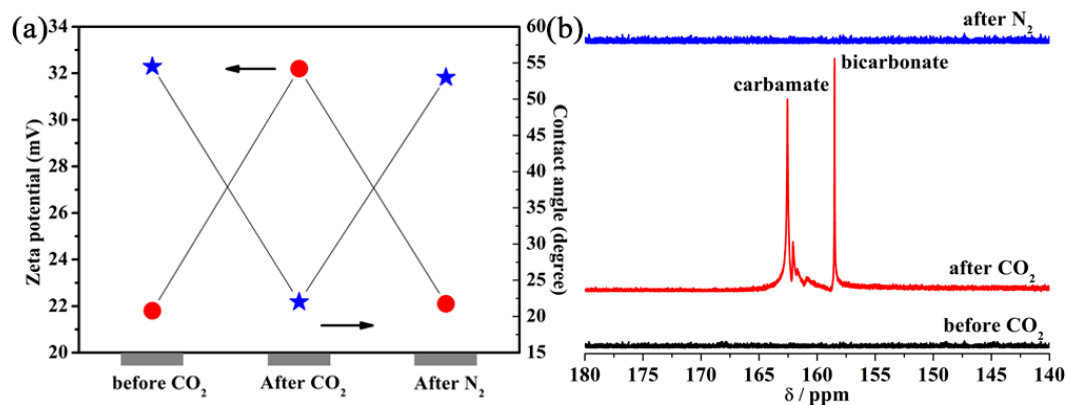

**Figure S19** Zeta potential and contact angle of H-UiO-66-(OAEAPTMS)<sub>2</sub> before CO<sub>2</sub>, after CO<sub>2</sub> and after N<sub>2</sub>.

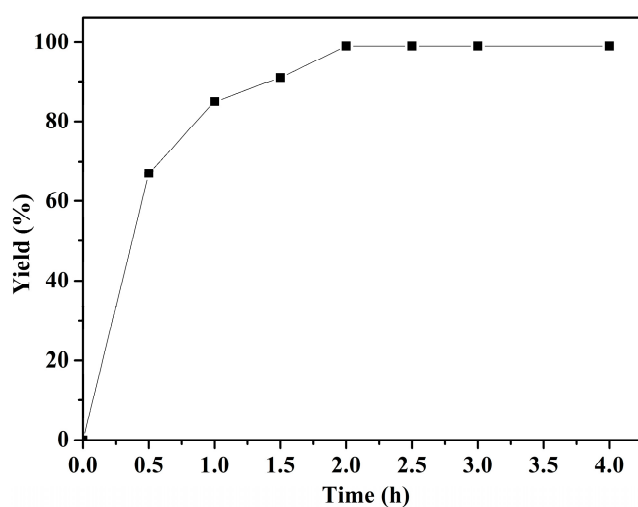

**Figure S20** The variation of 2-benzylidenemalononitrile yield with reaction time in H-UiO-66-(OAEAEAPTMS)<sub>2</sub>-based Pickering emulsion at 25°C

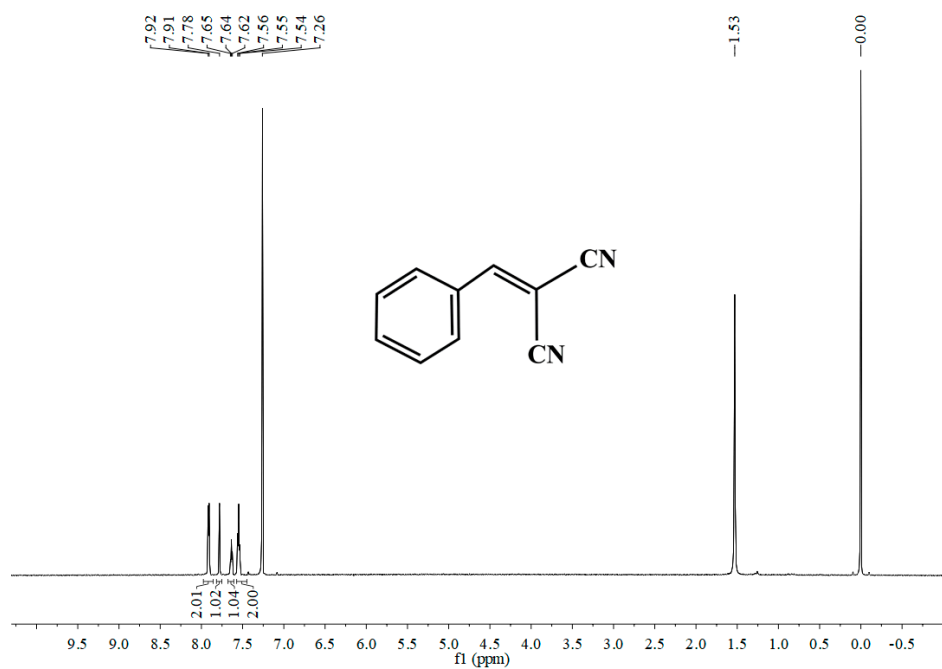

**Figure S21**  $^1\text{H}$  NMR of 2-benzylidenemalononitrile.

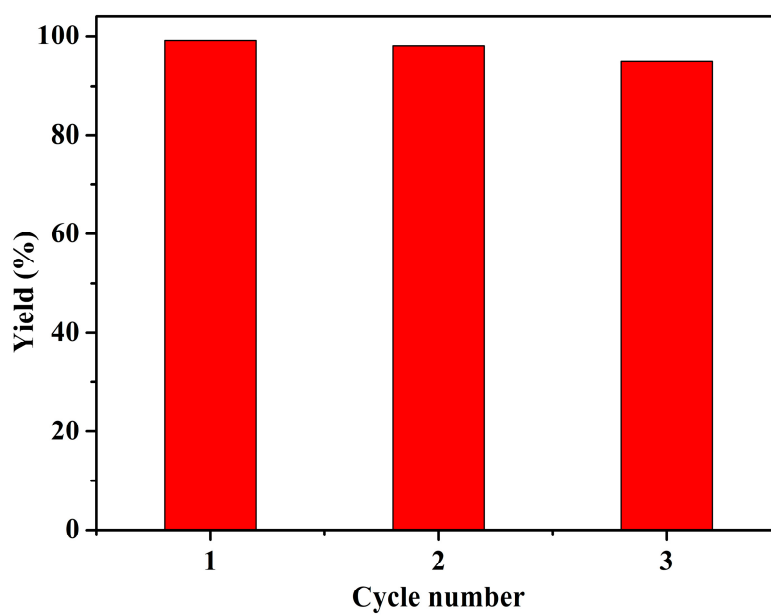

**Figure S22** The recyclability of Pickering emulsion in the reaction of benzaldehyde with malononitrile.

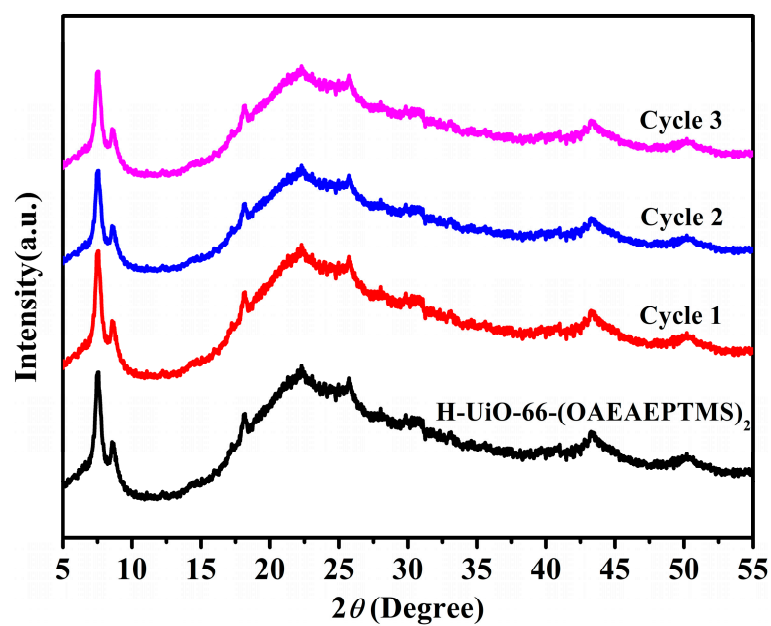

**Figure S23** PXRD patterns of H-UiO-66-(OAEAEPTMS)<sub>2</sub> before and after each catalytic run.

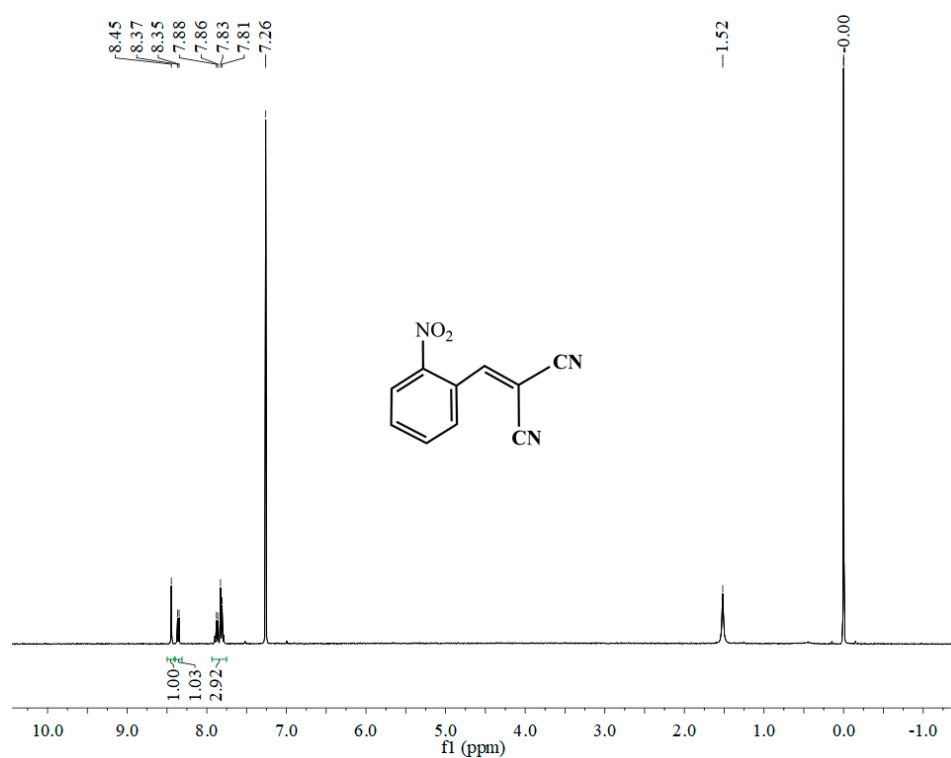

**Figure S24** <sup>1</sup>H NMR of 2-(2-nitrobenzylidene)malononitrile.

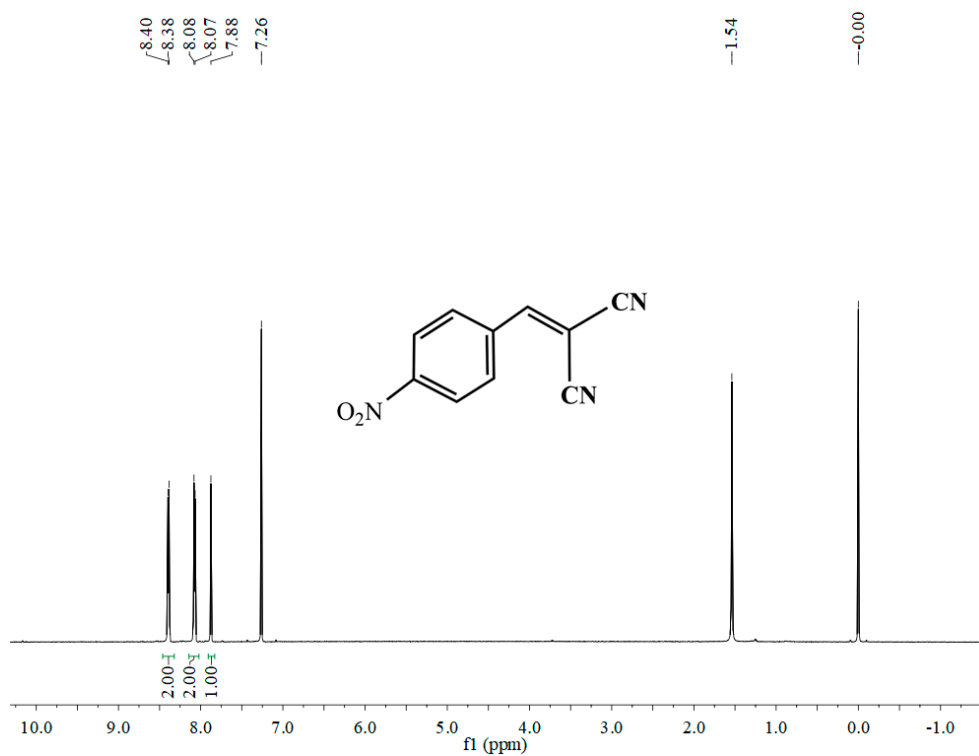

**Figure S25** <sup>1</sup>H NMR of 2-(4-nitrobenzylidene)malononitrile.

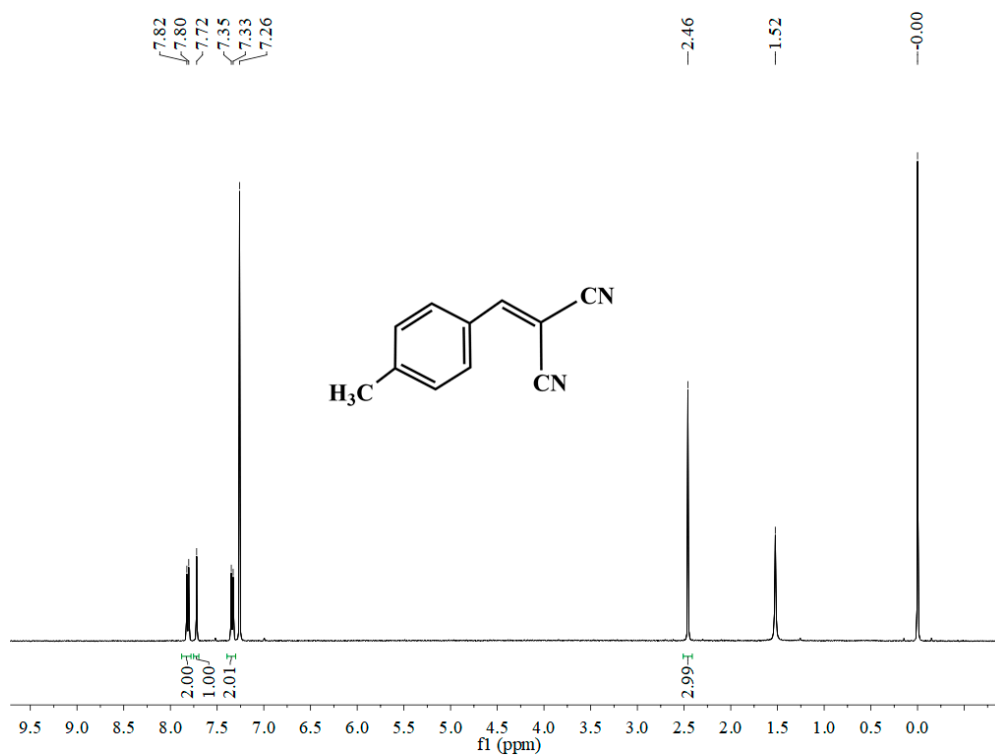

**Figure S26** <sup>1</sup>H NMR of 2-(4-methylbenzylidene)malononitrile.

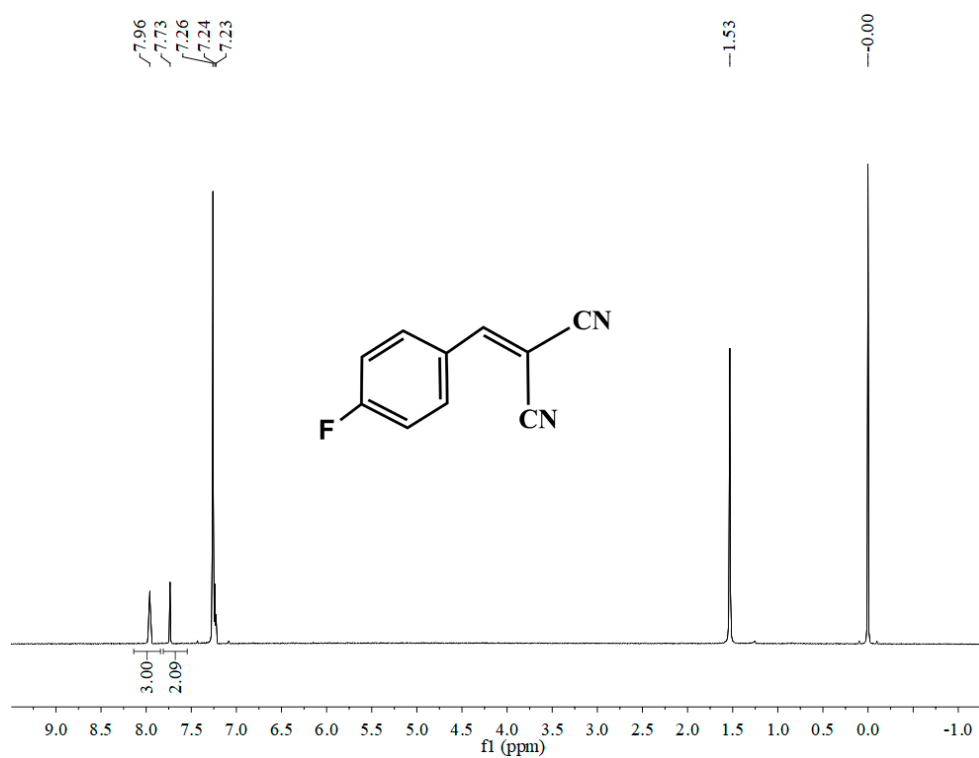

**Figure S27** <sup>1</sup>H NMR of 2-(4-fluorobenzylidene)malononitrile.

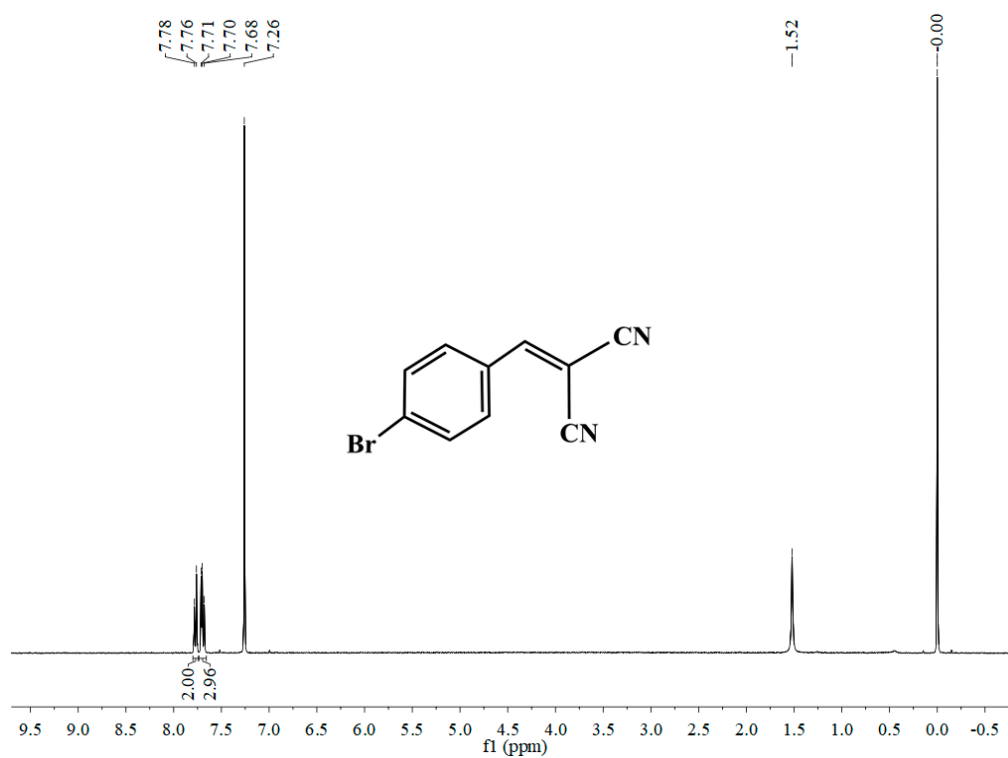

**Figure S28** <sup>1</sup>H NMR of 2-(4-bromobenzylidene)malononitrile.

### 3. Tables S1-S2

**Table S1** Surface chemical composition of the pristine and functionalized H-UiO-66-(OH)<sub>2</sub> (in at.%).

| MOF                                | Zr   | C     | O     | N     | Si   |
|------------------------------------|------|-------|-------|-------|------|
| H-UiO-66-(OH) <sub>2</sub>         | 1.24 | 84.43 | 14.34 |       |      |
| H-UiO-66-(OAPTMS) <sub>2</sub>     | 1.20 | 58.62 | 15.47 | 22.14 | 2.57 |
| H-UiO-66-(OAEAPTMS) <sub>2</sub>   | 1.26 | 57.13 | 20.06 | 16.33 | 5.21 |
| H-UiO-66-(OAEAEAPTMS) <sub>2</sub> | 1.72 | 58.11 | 20.82 | 15.09 | 4.26 |

**Table S2** Reaction of benzaldehyde and malononitrile under different catalyst conditions.

| Entry | Catalyst                           | GC Yield (%) |
|-------|------------------------------------|--------------|
| 1     | No                                 | 3            |
| 2     | H-UiO-66-(OAPTMS) <sub>2</sub>     | 80           |
| 3     | H-UiO-66-(OAEAPTMS) <sub>2</sub>   | 85           |
| 4     | H-UiO-66-(OAEAEAPTMS) <sub>2</sub> | 93           |

**Table S3.** Recyclability data of reaction of aldehydes and malononitrile under the same conditions.

| Entry | Product                                                                             | Cycle 1 (%) | Cycle 2 (%) | Cycle 3 (%) |
|-------|-------------------------------------------------------------------------------------|-------------|-------------|-------------|
| 1     | 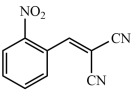 | 99          | 98          | 98          |
| 2     |  | 99          | 98          | 98          |
| 3     |  | 98          | 97          | 96          |
| 4     |  | 64          | 62          | 61          |
| 5     |  | 74          | 72          | 72          |
